# Supplementary material
Source: publisher site journal article supplement (https://www.dovepress.com/article/368486)
Supplement: Supplementary file 1 [file get_supplementary_file.php]

**Supplementary Materials**

**Table S1** Demographic and professional characteristics of participating healthcare practitioners (N=136)

| **Characteristics** | **N** | **Percentage** |
| --- | --- | --- |
| **Age (years)** |  |  |
| 25-35 | 61 | 44.9% |
| 36-45 | 49 | 36.0% |
| 46-55 | 17 | 12.5% |
| >55 | 9 | 6.6% |
| **Gender** |  |  |
| Male | 67 | 49.3% |
| Female | 69 | 50.7% |
| **Professional Category** |  |  |
| Physician | 70 | 51.5% |
| Pharmacist | 39 | 28.7% |
| Nurse | 5 | 3.7% |
| Other HCPs | 22 | 16.2% |
| **Professional Ranking** |  |  |
| Consultant | 30 | 22.1% |
| Specialist | 50 | 36.8% |
| Registrar | 24 | 17.6% |
| Resident | 10 | 7.4% |
| Others | 22 | 16.2% |
| **Specialty** |  |  |
| Medicine | 12 | 8.8% |
| Family medicine | 11 | 8.1% |
| Ophthalmology | 9 | 6.6% |
| Pediatrics | 9 | 6.6% |
| Surgery | 7 | 5.1% |
| Emergency | 4 | 2.9% |
| ENT | 3 | 2.2% |
| Nephrology | 3 | 2.2% |
| Psychiatry | 3 | 2.2% |
| ICU | 3 | 2.2% |
| Pharmacy | 51 | 37.5% |
| Nursing | 5 | 3.7% |
| Others | 16 | 11.8% |

**Table S2** Computer access and literacy among participating healthcare practitioners (N=136)

| **Questions** | **Number** | **Percentage** |
| --- | --- | --- |
| **How often do you use personal computer in your hospital?** |  |  |
| Never | 21 | 15.4% |
| Rarely and sometimes | 40 | 29.4% |
| Often or always | 75 | 55.1% |
| **How often do you** **search for online medical information during work?** |  |  |
| Never | 2 | 1.5% |
| Rarely and sometimes | 54 | 39.7% |
| Often or always | 80 | 58.8% |
| **How often do you** **use online medical information resources in your hospital?** |  |  |
| Never | 5 | 3.7% |
| Rarely and sometimes | 55 | 40.4% |
| Often or always | 76 | 55.9% |
| **In your role as healthcare practitioners,** **how often do you interact with patients via e-mail, phone, or social media?** |  |  |
| Never | 28 | 20.6% |
| Rarely and sometimes | 68 | 50.0% |
| Often or always | 40 | 29.4% |
| **In your role as healthcare practitioners, how often do you communicate with other medical staff out of your hospital?** |  |  |
| Never | 12 | 8.8% |
| Rarely and sometimes | 52 | 38.2% |
| Often or always | 72 | 52.9% |
| **Have been questioned** **by patients about online means of contraction you in your hospital?** |  |  |
| No | 80 | 58.8% |
| Yes | 56 | 41.2% |
| **Do you use Internet for the following purposes?** |  |  |
| Obtaining information to give a patient | 92 | 67.6% |
| Patient consultation | 56 | 41.2% |
| Literature search | 94 | 69.1% |
| Maintain your knowledge and skills | 110 | 80.9% |
| **Are you** **concerned about possible legal and regulatory issues around interacting with patients online?** |  |  |
| No | 40 | 29.4% |
| Yes | 96 | 70.6% |

**Table S3** Knowledge of telemedicine among participating healthcare practitioners (N=136)

| **Questions** | **Number** | **Percentage** |
| --- | --- | --- |
| **How familiar are you with telemedicine technology in your hospital?** |  |  |
| Low | 34 | 27.6% |
| Average | 69 | 56.1% |
| High | 20 | 16.3% |
| **How familiar are you with the medical applications of telemedicine technology in your hospital?** |  |  |
| Low | 37 | 30.1% |
| Average | 61 | 49.6% |
| High | 25 | 20.3% |
| **How often conferences, continuous education, or meetings held in your hospital regarding telemedicine technology?** |  |  |
| Low | 44 | 35.8% |
| Average | 50 | 40.7% |
| High | 29 | 23.6% |
| **How familiar are you with telemedicine tools in your hospital?** |  |  |
| Low | 42 | 34.1% |
| Average | 60 | 48.8% |
| High | 21 | 17.1% |
| **How familiar are you with telemedicine guidelines in your hospital?** |  |  |
| Low | 49 | 39.8% |
| Average | 45 | 36.6% |
| High | 29 | 23.6% |
| **How familiar are you with telemedicine security and privacy policy in your hospital?** |  |  |
| Low | 55 | 44.7% |
| Average | 50 | 40.7% |
| High | 18 | 14.6% |
| **How familiar are you with the use of telemedicine in other countries?** |  |  |
| Low | 50 | 40.7% |
| Average | 64 | 52.0% |
| High | 9 | 7.3% |
| **To what level is there a need for continuous training in the use of telemedicine for healthcare** **practices in your hospital?** |  |  |
| Low | 12 | 9.8% |
| Average | 49 | 39.8% |
| High | 62 | 50.4% |

**Table S4** Perceptions and willingness about telemedicine among participating healthcare practitioners (N=136)

| **Questions** | **N=136*** | **Percentage*** |
| --- | --- | --- |
| **Perceptions** |  |  |
| Telemedicine is a reliable approach to provide patients with medical care services in your hospital | 104 | 86.0% |
| There is a potential role for information and communications technology in your hospital | 109 | 90.1% |
| Using a telemedicine system can save time and money for your hospital and patients | 114 | 94.2% |
| Telemedicine systems can improve quality and safety of care in your hospital | 109 | 90.1% |
| Applications of information and communications technology is already available in your hospital | 94 | 77.7% |
| **Willingness** |  |  |
| I would really like to consult with large centers in my specialty | 114 | 95.0% |
| I would like to be able to watch a procedure virtually as it is taking place | 113 | 94.2% |
| The implementation of telemedicine technology is appropriate due to the current precaution measures in hospitals | 113 | 94.2% |
| I think that all healthcare practitioners are willing to implement telemedicine technology in the hospital | 102 | 85.0% |
| Telemedicine system can be integrated within the existing system | 102 | 85.0% |

* Numbers and percentages represent those who agree with statements

**Table S5** Scores of computer access, knowledge, perceptions, and willingness about telemedicine by demographic and professional characteristics of participating healthcare workers (N=136)

| **Characteristics** | **Computer access** | **Knowledge of telemedicine** | **Perceptions of telemedicine** | **Willingness about telemedicine** |
| --- | --- | --- | --- | --- |
| **Age (years)** |  |  |  |  |
| 25-35 | 66.1%±20.1% | 57.8%±16.5% | 85.8%±21.5% | 88.9%±22.9% |
| 36-45 | 65.1%±15.7% | 68.8%±14.1% | 92.3%±13.1% | 93.5%±14.9% |
| 46-55 | 64.7%±18.3% | 63.3%±18.0% | 81.3%±29.6% | 91.3%±14.5% |
| >55 | 66.7%±15.6% | 64.8%±18.4% | 86.7%±22.4% | 86.7%±26.5% |
| p-value | 0.965 | 0.005 | 0.585 | 0.787 |
| **Gender** |  |  |  |  |
| Male | 61.6%±15.7% | 64.6%±15.3% | 90.5%±19.3% | 91.0%±20.7% |
| Female | 69.5%±19.2% | 61.2%±17.8% | 84.5%±21.2% | 90.3%±18.4% |
| p-value* | 0.003 | 0.228 | 0.048 | 0.481 |
| **Professional category** |  |  |  |  |
| Physician | 65.0%±16.1% | 63.9%±16.0% | 88.3%±20.9% | 91.9%±19.1% |
| Pharmacist | 73.2%±16.3% | 59.8%±15.2% | 84.4%±18.0% | 87.8%±21.0% |
| Nurse | 38.2%±13.5% | 55.6%±19.7% | 100.0%±0.0% | 100.0%±0.0% |
| Other HCWs | 60.3%±19.6% | 66.7%±20.2% | 90.0%±24.0% | 91.1%±19.7% |
| p-value | 0.001 | 0.456 | 0.187 | 0.510 |
| **Professional ranking** |  |  |  |  |
| Consultant | 66.8%±15.2% | 63.7%±15.4% | 86.9%±20.9% | 87.6%±21.0% |
| Specialist | 70.3%±18.5% | 64.1%±17.3% | 86.7%±20.0% | 88.9%±22.0% |
| Registrar | 63.1%±16.5% | 61.4%±14.0% | 90.9%±17.2% | 94.3%±14.3% |
| Resident | 66.4%±17.4% | 57.9%±21.6% | 82.2%±21.1% | 100.0%±0.0% |
| Others | 55.8%±18.9% | 63.2%±18.1% | 90.0%±25.3% | 91.3%±20.6% |
| p-value | 0.031 | 0.858 | 0.505 | 0.302 |
| **Specialty** |  |  |  |  |
| Medicine | 65.9%±14.7% | 61.3%±20.4% | 88.0%±21.5% | 92.0%±19.3% |
| Family medicine | 63.2%±14.6% | 61.4%±11.2% | 90.9%±13.8% | 96.4%±8.1% |
| Ophthalmology | 58.1%±21.8% | 64.2%±23.7% | 92.0%±17.9% | 100.0%±0.0% |
| Pediatrics | 66.2%±15.4% | 61.6%±13.9% | 88.9%±14.5% | 95.6%±8.8% |
| Surgery | 74.7%±12.3% | 72.0%±15.2% | 94.3%±15.1% | 91.4%±15.7% |
| Emergency | 63.6%±19.3% | 67.7%±15.7% | 80.0%±28.3% | 80.0%±28.3% |
| ENT | 65.2%±10.5% | 77.8%±16.8% | 93.3%±11.5% | 93.3%±11.5% |
| Pharmacy | 69.9%±17.2% | 61.2%±15.4% | 85.5%±21.1% | 88.1%±21.5% |
| Nursing | 38.2%±13.5% | 55.6%±19.7% | 100.0%±0.0% | 100.0%±0.0% |
| Others | 63.6%±19.8% | 63.7%±19.4% | 86.1%±25.9% | 89.1%±25.2% |
| p-value | 0.074 | 0.768 | 0.905 | 0.782 |

* p-value was derived from Mann-Whitney test while all other p-values were derived from Kruskal Wallis test
